# Supplementary material
Source: PubMed Central journal article supplement (PMC6896855)
Supplement: tpmd190376.SD1.pdf [file tpmd190376.SD1.pdf]

**COUGH AND SNEEZE INTO UPPER ARM,  
SAVE YOURSELF AND SAVE OTHERS!!**

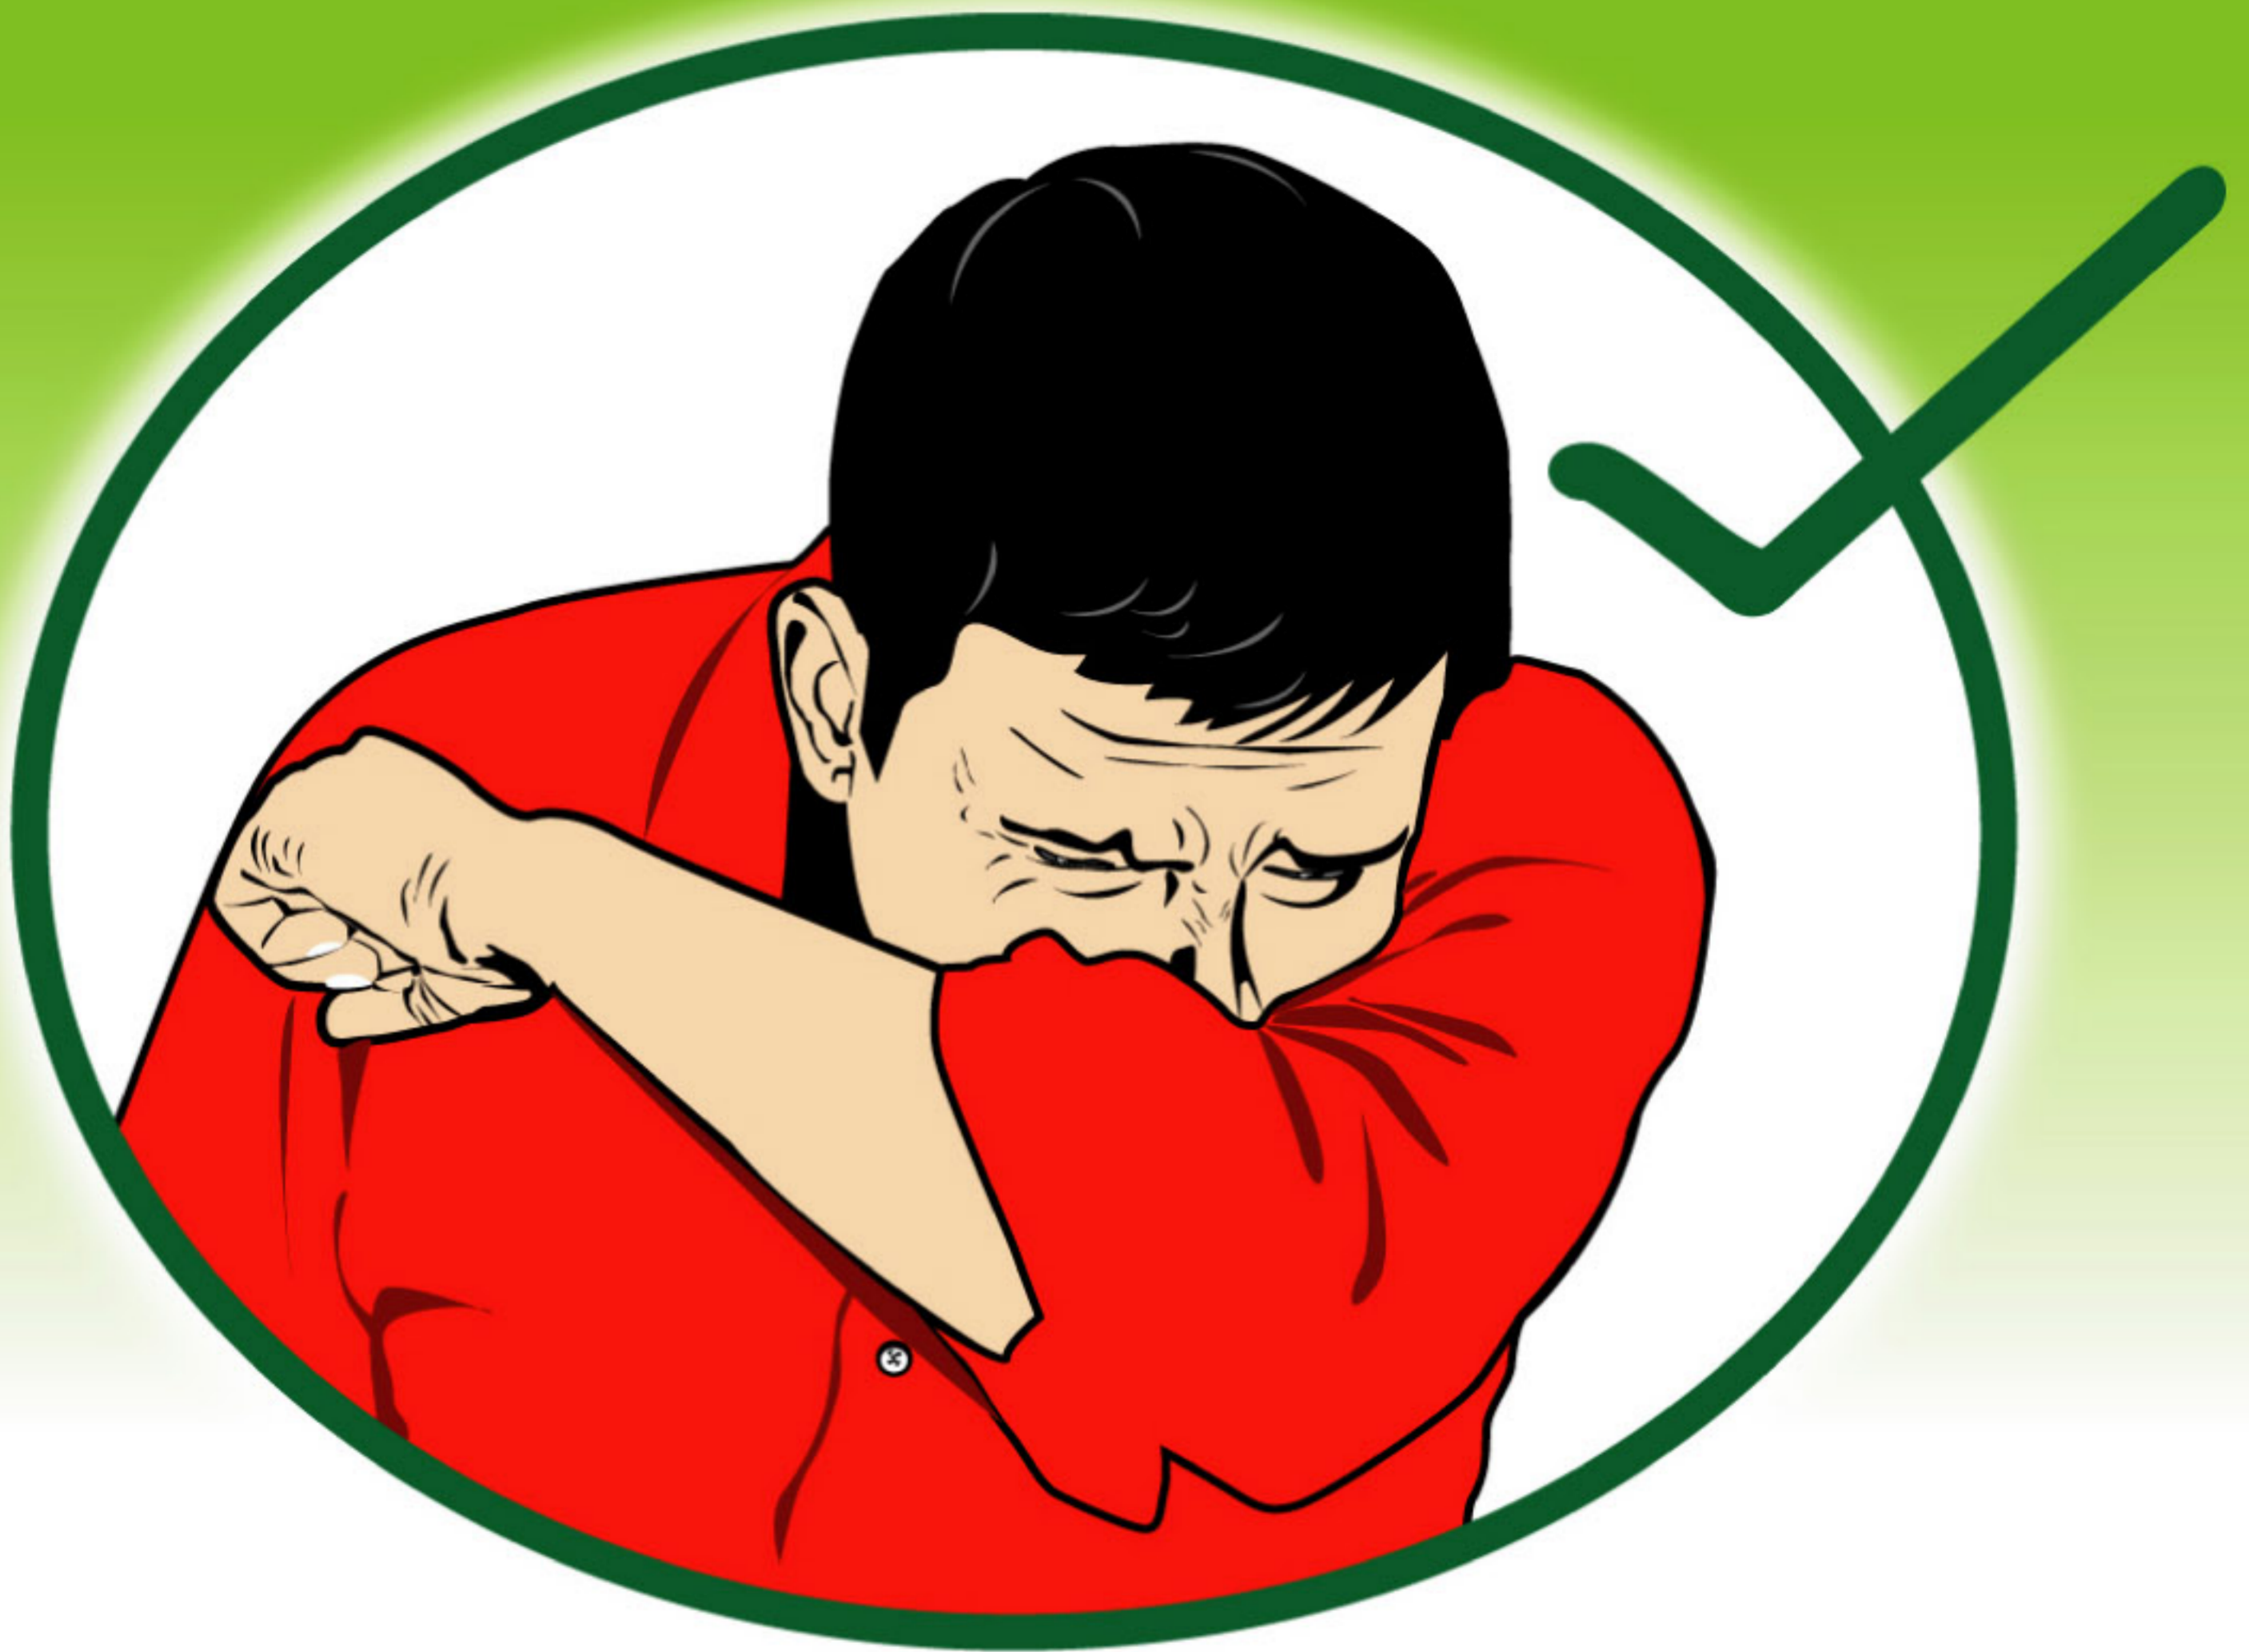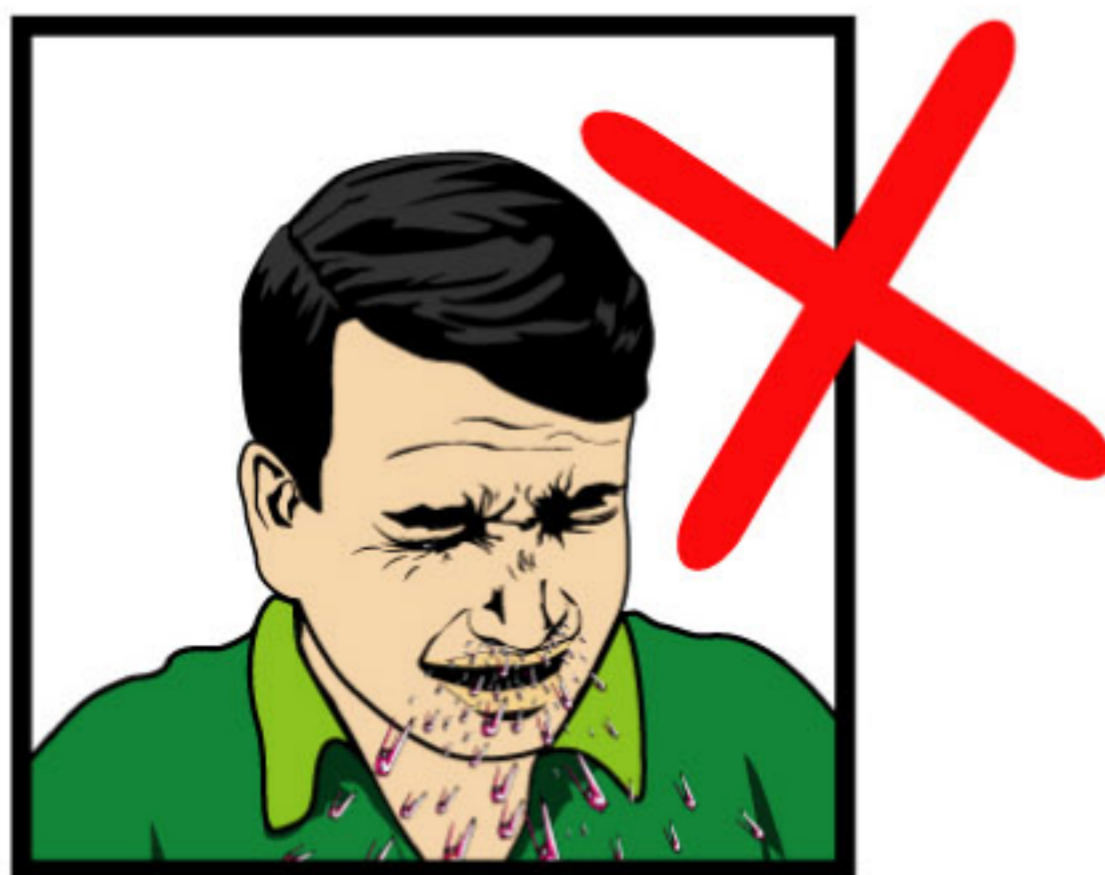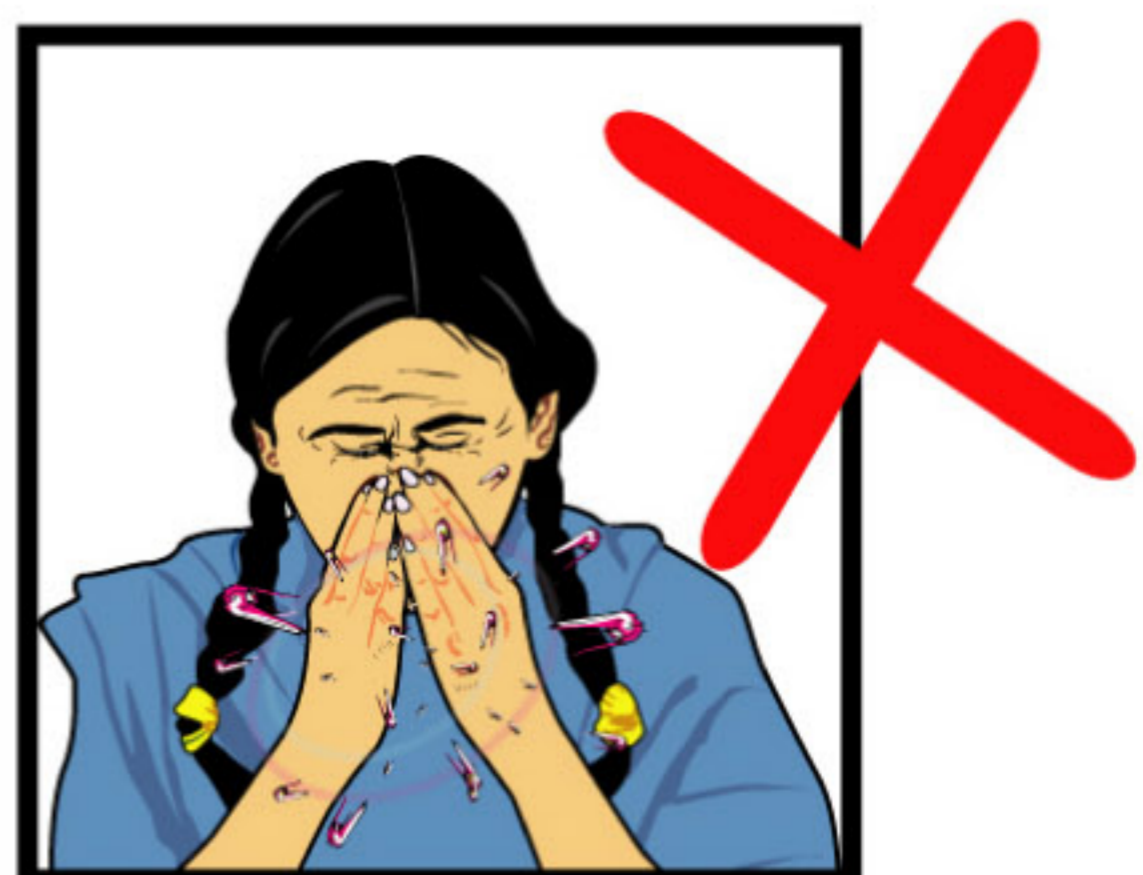

# USE HAND SANITIZER AT SCHOOL, STOP GERMS AND BE HEALTHY!!

## 5 Key times for sanitizer use

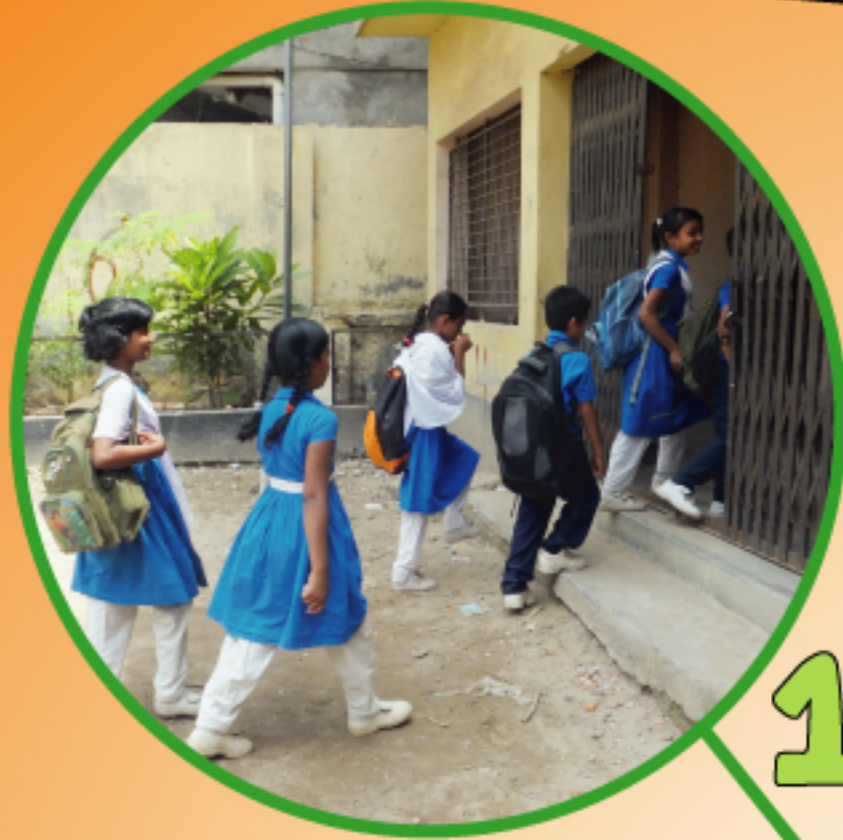

1

On arrival at school

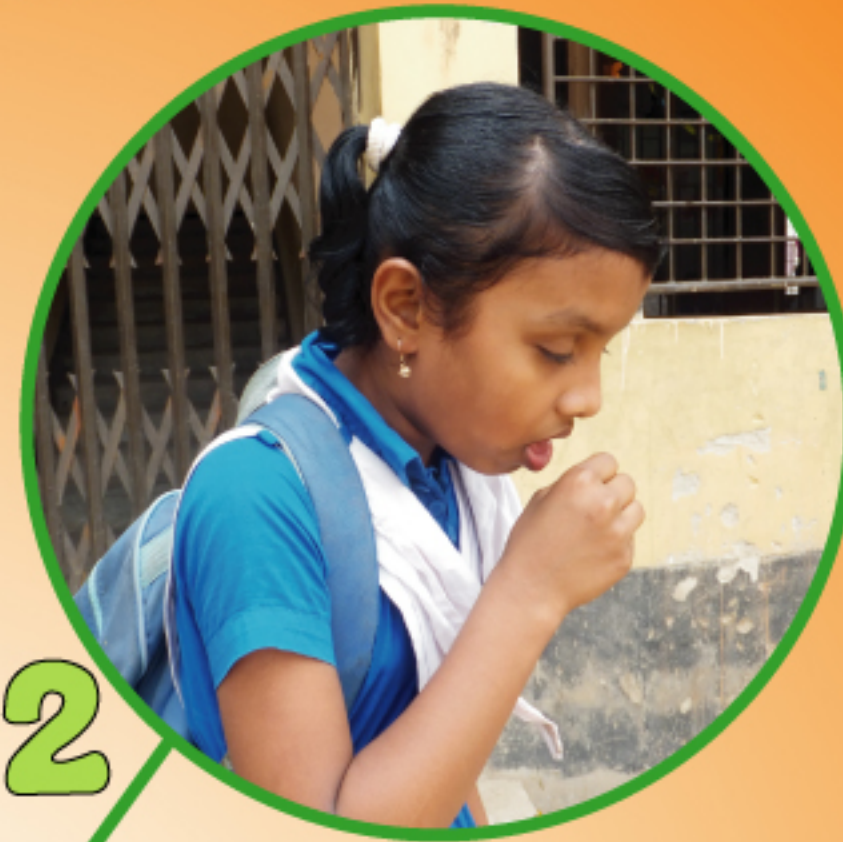

2

After coughing and/or sneezing

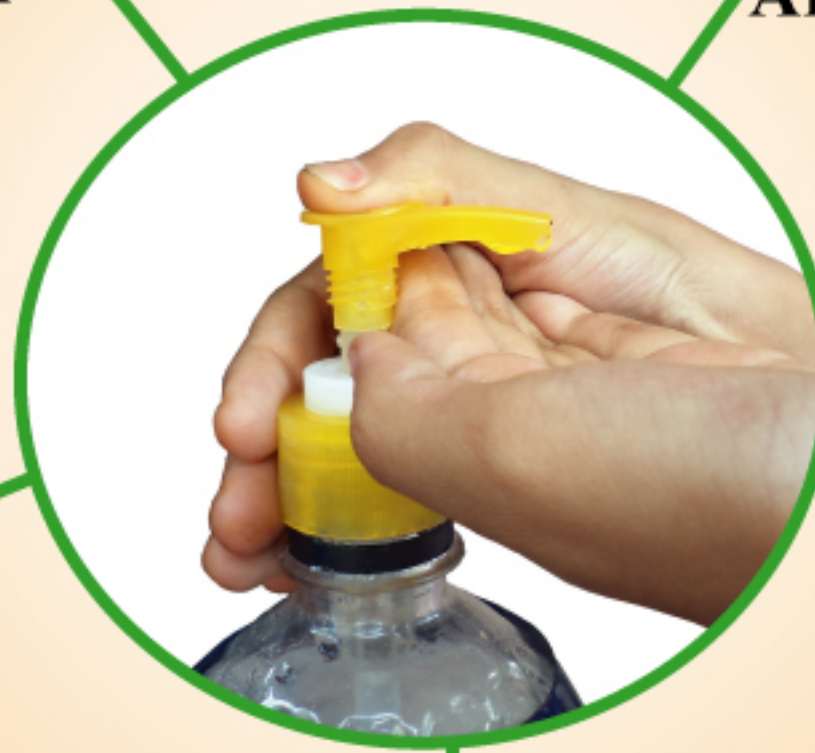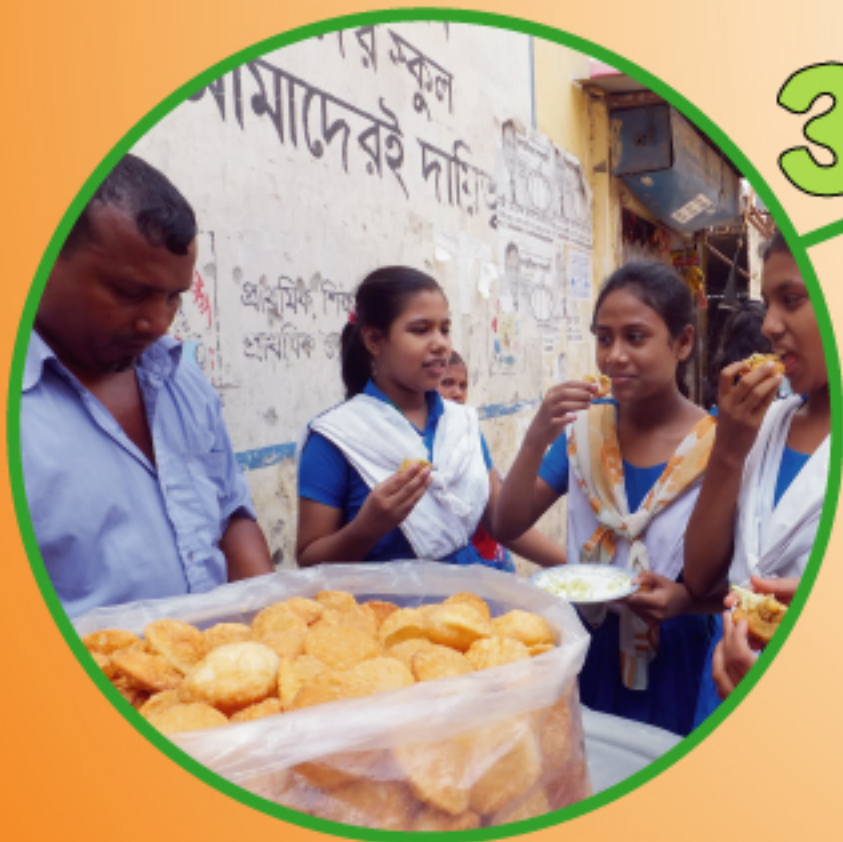

3

Before having any food

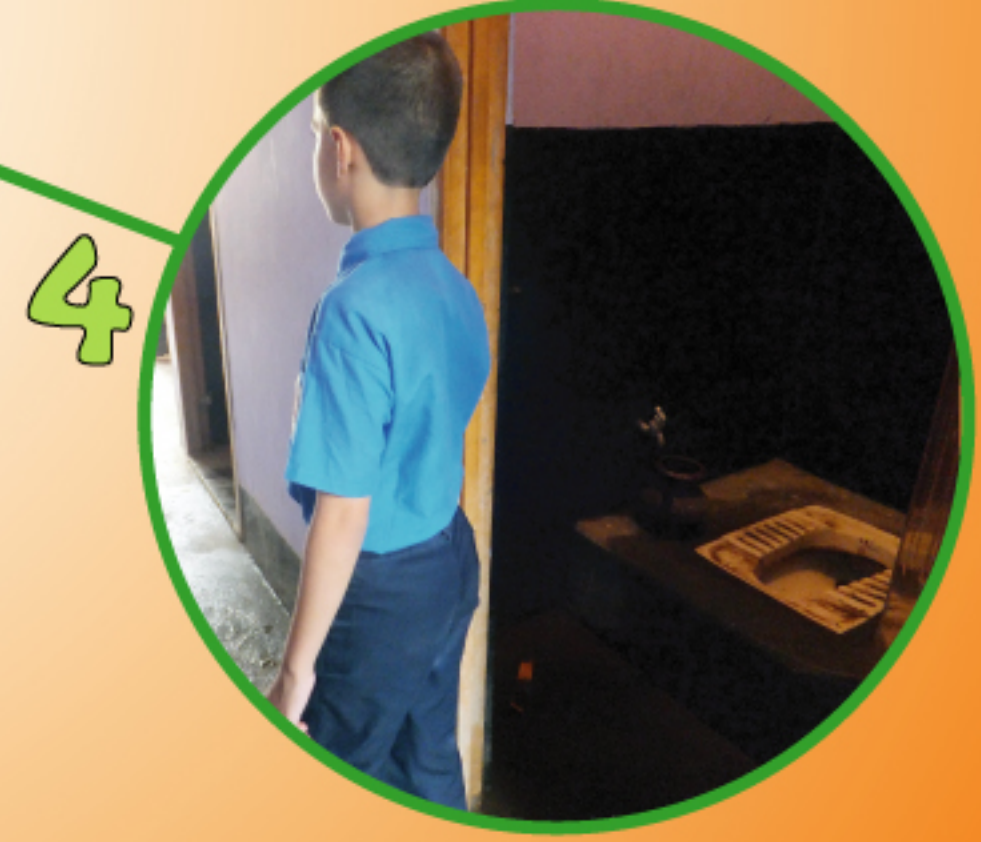

4

After toilet/washroom use

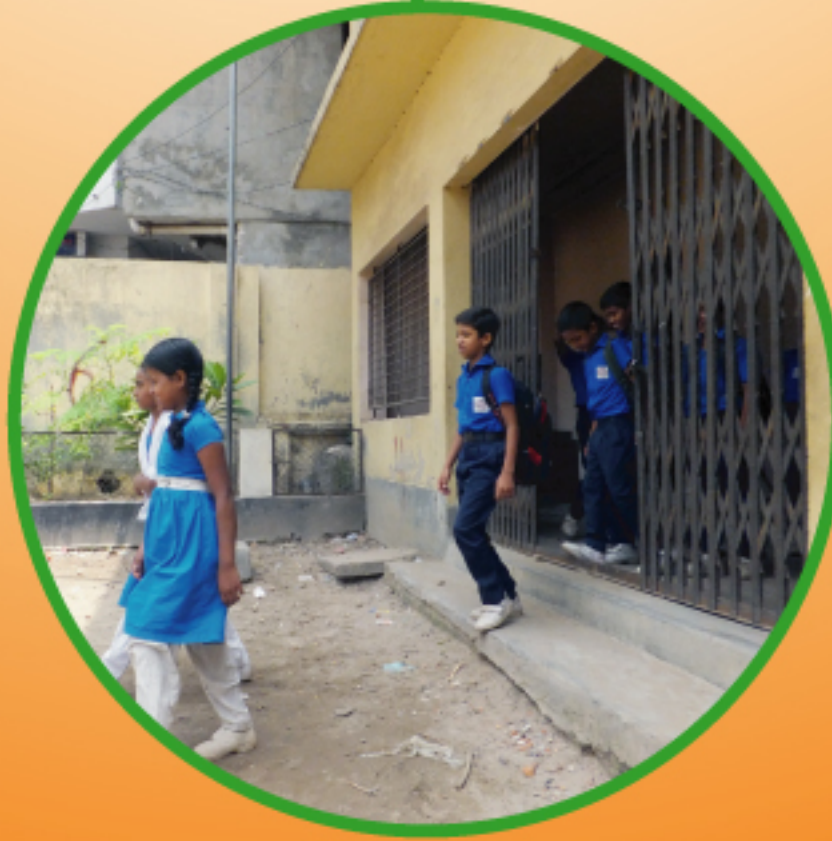

5

When leaving school  
at the end of the day

## How to clean your hands using hand sanitizer

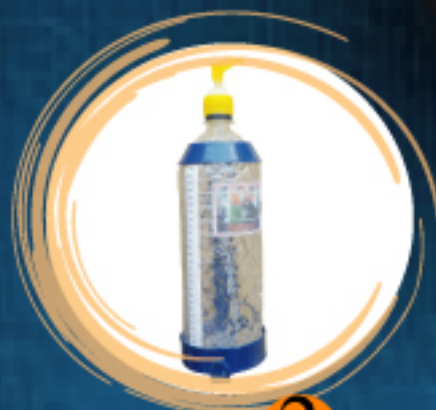

1

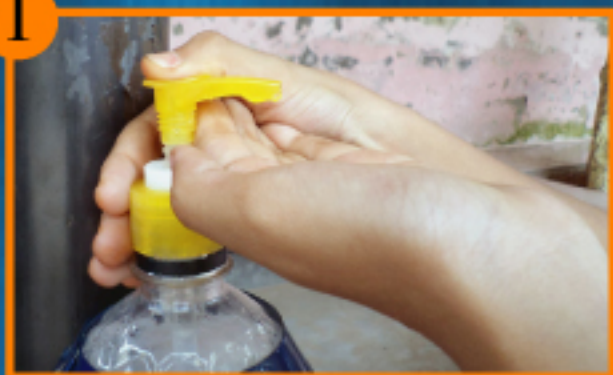

Put a coin size drop of sanitizer on your palm

2

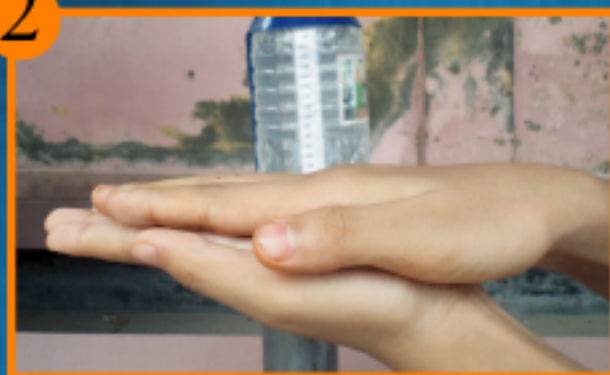

Rub hands palm to palm

3

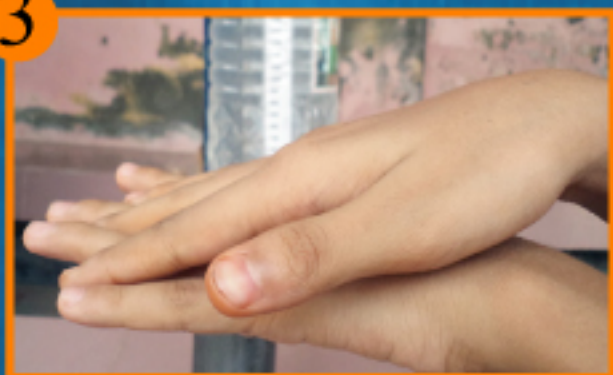

Rub the back of the hand with the palm of the other hand

4

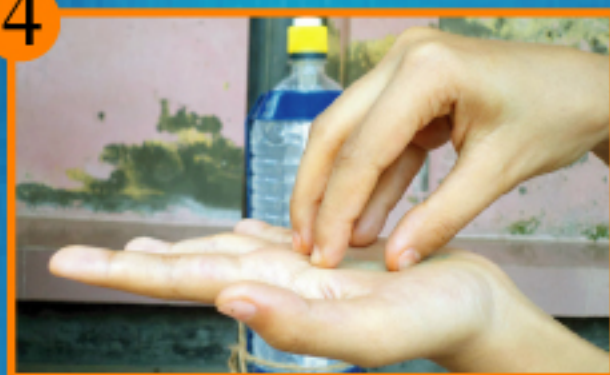

Clean the nails with sanitizer from the palm of the other hand

5

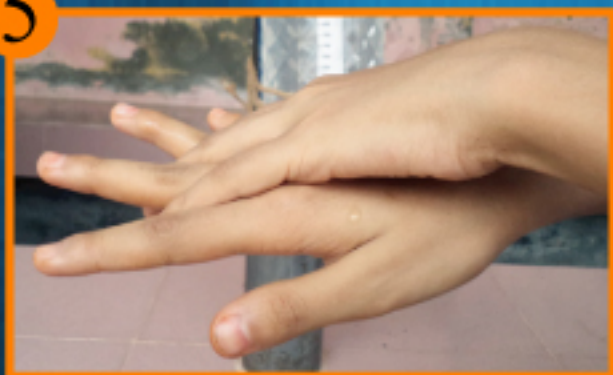

Clean between the fingers with sanitizer

6

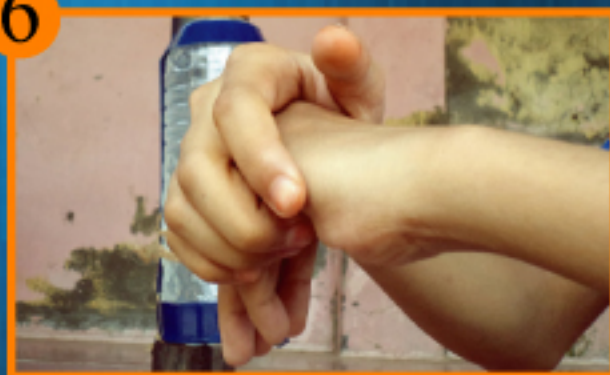

Rub hands with sanitizer and surface together until dry
